# Supplementary material for: Canonical Wnt inhibitors ameliorate cystogenesis in a mouse ortholog of human ADPKD
Source: JCI journal article supplement (doi:10.1172/jci.insight.95874), 2018-03-07
Supplement: sd1 [file 1]

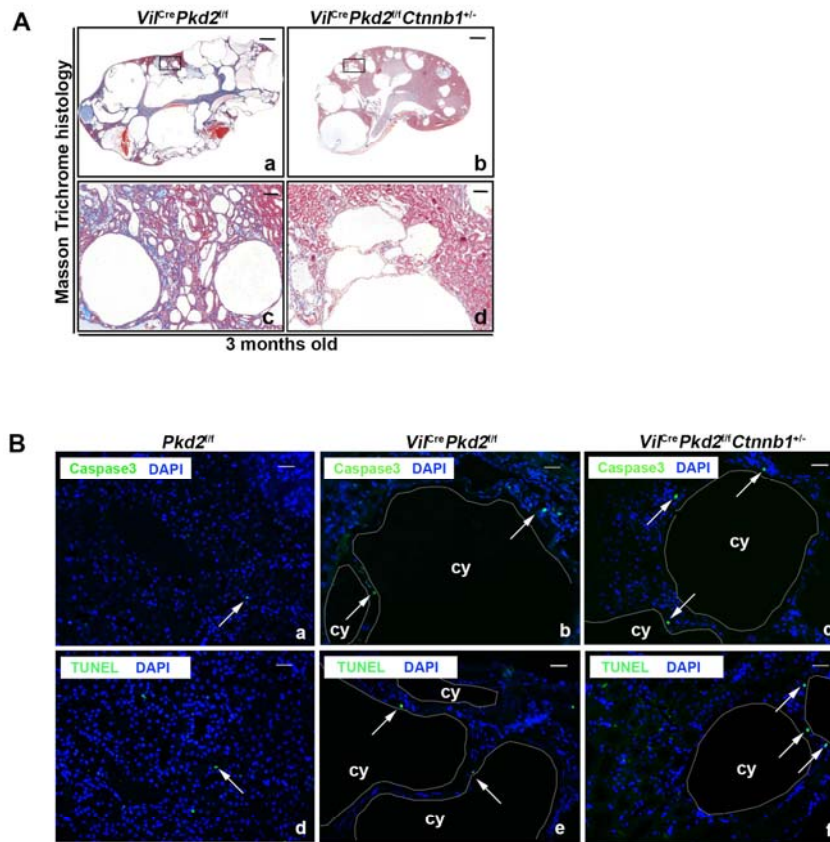

Fig. S1

**Fig S1. Effects of allelic reduction of *Ctnnb1*.**

(A) Masson trichrome staining images of renal sections from *Vil<sup>Cre</sup>Pkd2<sup>flf</sup>* and *Vil<sup>Cre</sup>Pkd2<sup>flf</sup>Ctnnb1<sup>+/-</sup>* mice were showed. All samples were collected at 3 months of age.

Scale bars: 800  $\mu\text{m}$  in a-b, 100  $\mu\text{m}$  in c-d.

(B) Representative images of renal sections stained with an antibody to cleaved caspase-3 (a-c) and by TUNEL assay (d-f). cy: cyst. Scale bars: 60  $\mu\text{m}$ . Data are from 3 animals/group.

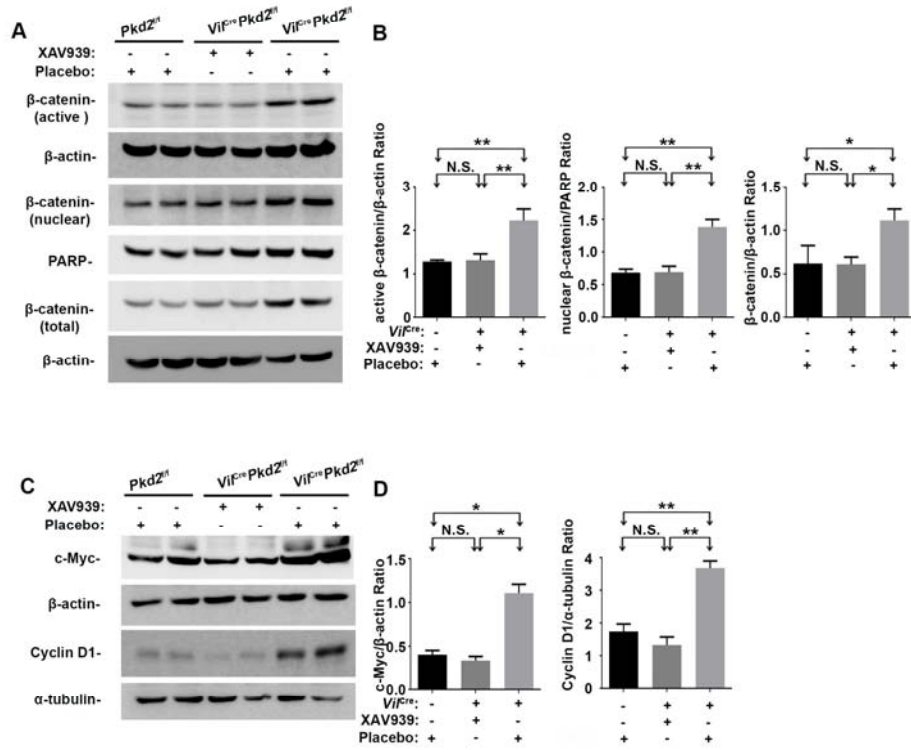

Fig. S2

**Fig. S2. XAV939 rescues the elevated expression of  $\beta$ -catenin and its target genes induced by PC2 deficiency.**

(A-B) Representative western blots for the active, nuclear, and total  $\beta$ -catenin from the renal lysates of *Pkd2<sup>flf</sup>*, XAV939-treated and DMSO (placebo)-treated *Vil<sup>Cre</sup>Pkd2<sup>flf</sup>* mice are shown, along with (B) Normalized quantitative analysis of the densitometry values of the tested tissues.

(C-D) Representative western blots of the same lysates also showed that XAV939 treatment suppressed the  $\beta$ -catenin-mediated transcription (c-Myc and Cyclin D1) activated by PC2 deficiency. Samples were collected at 2 months of age. Data in B and D are presented as mean $\pm$ SEM (\*P<0.05 and \*\*P<0.01, Student's *t* test). Data are from 3 animals/group.

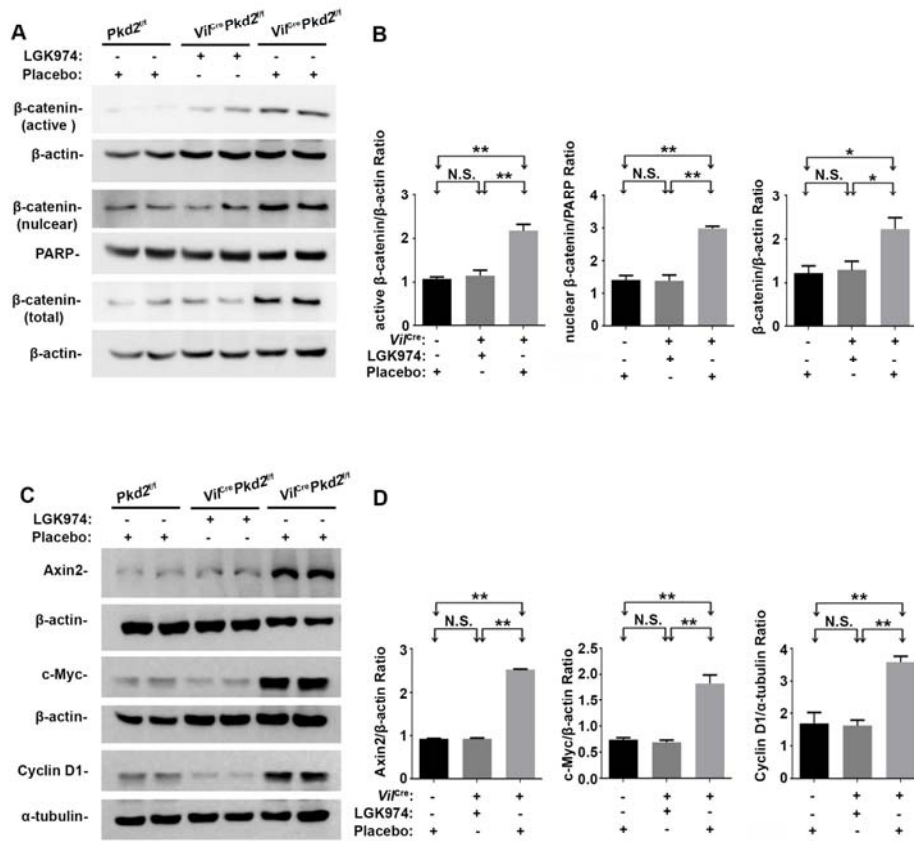

Fig. S3

**Fig. S3. LGK974 rescues the elevated expression of  $\beta$ -catenin and its target genes induced by PC2 deficiency.**

(A-B) Representative western blots for the active, nuclear, and total  $\beta$ -catenin from the renal lysates of *Pkd2<sup>flf</sup>*, LGK974-treated and DMSO (placebo)-treated *Vil<sup>Cre</sup>Pkd2<sup>flf</sup>* mice are shown, along with (B) Normalized quantitative analysis of the densitometry values of the tested tissues.

(C-D) Representative western blots of the same lysates also showed that LGK974 treatment suppressed the  $\beta$ -catenin-mediated transcription (including Axin2, c-Myc and Cyclin D1) activated by PC2 deficiency. Samples were collected at 3 months of age. Data in B and D are presented as mean $\pm$ SEM (\*P<0.05 and \*\*P<0.01, Student's *t* test). Data are from 3 animals/group.

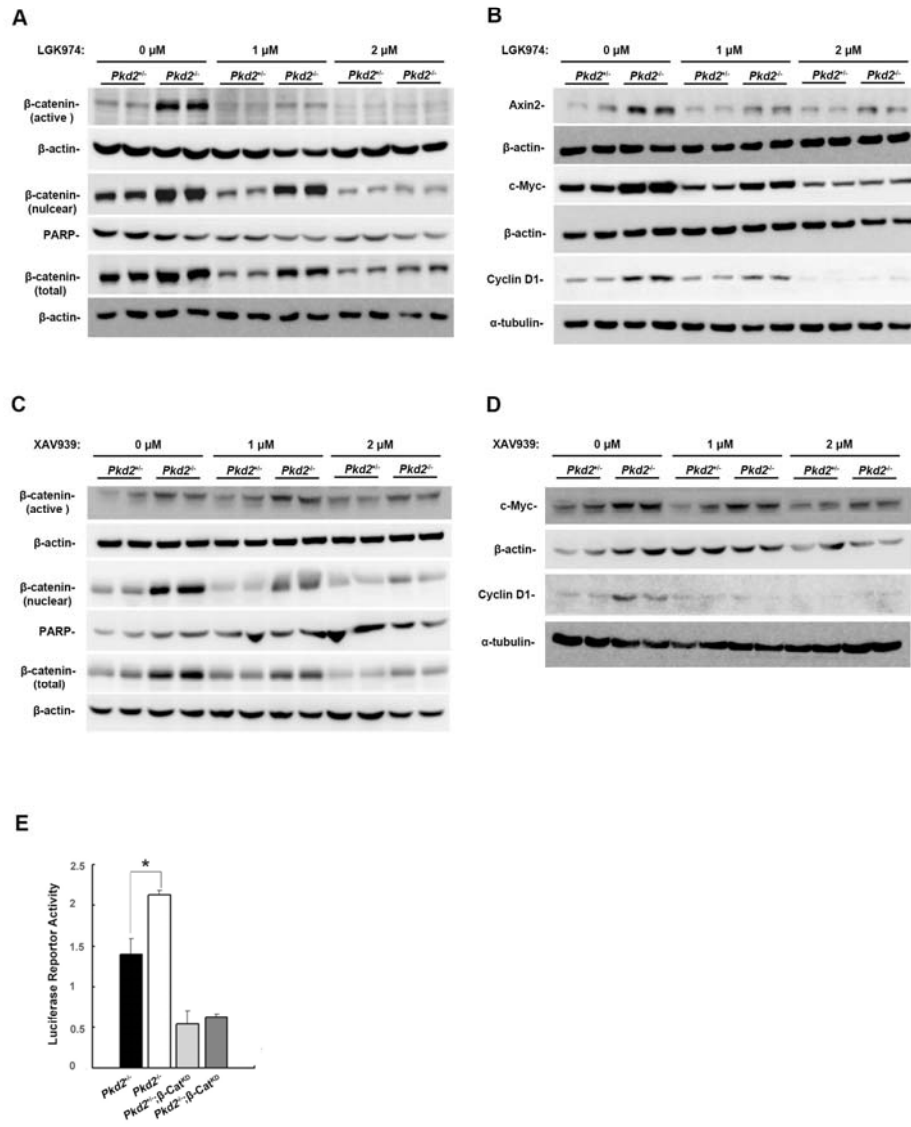

Fig. S4

**Fig. S4. LGK974 and XAV939 treatment reduced the active, nuclear, and total  $\beta$ -catenin levels in cultured renal epithelial cells.**

(A-B) *Pkd2*<sup>+/-</sup> and *Pkd2*<sup>-/-</sup> cells were incubated with 0, 1, or 2  $\mu$ M LGK974 for 24 hours or (C-D) with 0, 1, or 2  $\mu$ M XAV939 for 16 hours, and were analyzed by western blotting.

(E) Wnt reporter-gene activity was elevated in *Pkd2*<sup>-/-</sup> cells. Cells were transfected with the TOP-FLASH Wnt reporter gene Basal in the presence or absence of  $\beta$ -catenin siRNA, and reporter-gene activity was determined 24 hours after transfection. Data are presented as mean $\pm$ SEM (\*P<0.05; n=3, Student's *t* test).



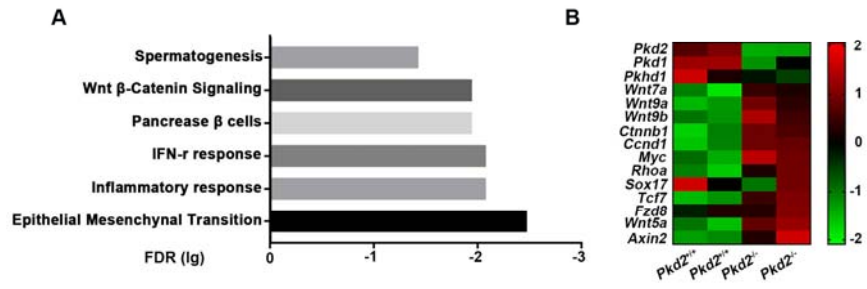

Fig. S5

**Fig. S5. Gene expression analysis of WT and *Pkd2*-null collecting duct cells.**

(A) Pathway analysis showed that the gene expression was significantly altered between WT and *Pkd2*-null cells; pathways with significant enrichment scores [ $\log_{10}$  (FDR)] are shown.

(B) Comparison of the expression of Wnt pathway-associated genes in *Pkd2*-null and WT cells.

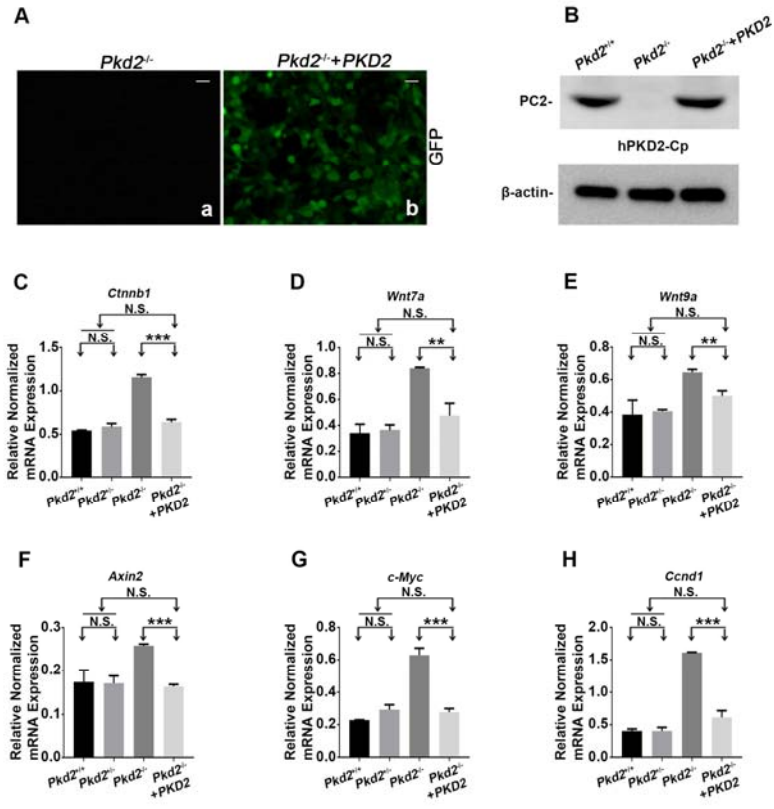

Fig. S6

**Fig. S6. Restoring PC2 in *Pkd2*<sup>-/-</sup> cells normalizes the dysregulated expression of Wnt signaling genes.**

(A-B) Validation of PC2 re-expression: the efficiency of re-expression was demonstrated by (A) GFP presence and (B) PC2 western blots.

(C-H) *PKD2* re-expression reduced the mRNA levels of *Ctnnb1*, *Wnt7a*, *Wnt9a*, *Axin2*, *c-Myc*, and *Ccnd1*, which were elevated in the *Pkd2*<sup>-/-</sup> cells. Data are presented as mean±SEM (\*\*P<0.01, and \*\*\*P<0.001, N.S.= No Significant; n=3, Student's *t* test).

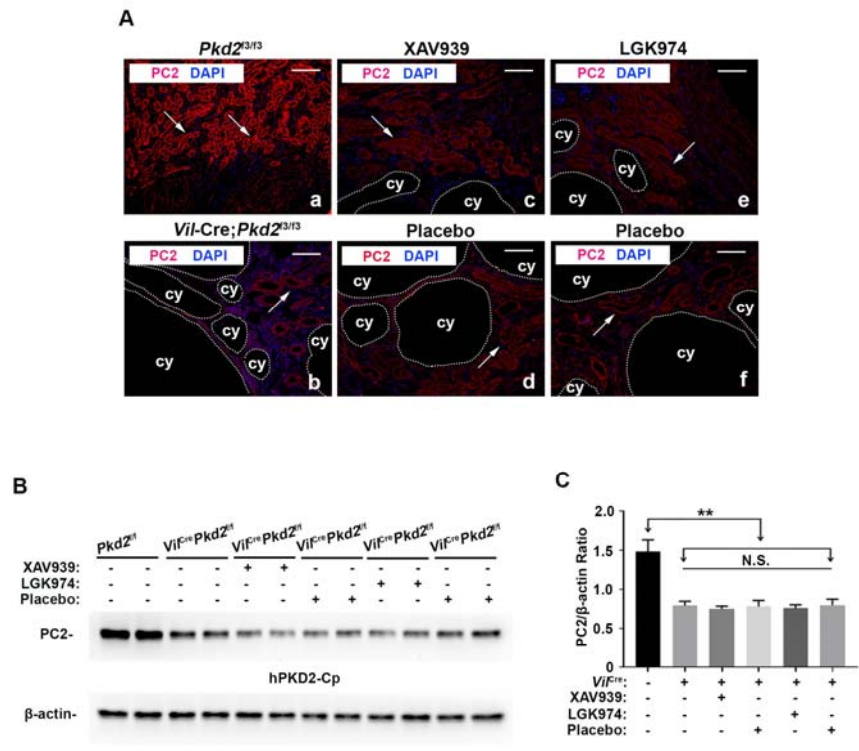

Fig. S7

**Figure S7. PC2 expression in the kidneys of *Pkd2<sup>ff</sup>* and *Vil<sup>Cre</sup>Pkd2<sup>ff</sup>* with and without XAV939- and LGK974-treated.**

(A) Using the anti-PC2 (hPKD2-Cp) polyclonal antibodies, immunofluorescence staining (arrows) showed significantly decreased PC2 expression (red) in the *Vil<sup>Cre</sup>Pkd2<sup>ff</sup>* kidneys compared to *Pkd2<sup>ff</sup>* control (a vs b). By the same staining, there was no PC2 expression difference among kidneys with or without LGK974 and XAV939 treatment (c vs d and e vs f). DAPI dye (blue) was used to stain nuclei. cy: cyst. Bars: 50  $\mu$ m in A.

(B) Duplicated lysates from the control *Pkd2<sup>ff</sup>* kidney and the *Vil<sup>Cre</sup>Pkd2<sup>ff</sup>* kidneys with or without XAV939 and LGK974 treatments were used to perform western blot analysis with the same anti-PC2 antibody. Similar results to (A) were observed.

(C) Normalized quantitative analysis of the densitometry values of the tested tissues. Data are presented as mean $\pm$ SEM (\*P<0.01, N.S.= No Significant; Student's *t* test). Data are from 3 animals/group.

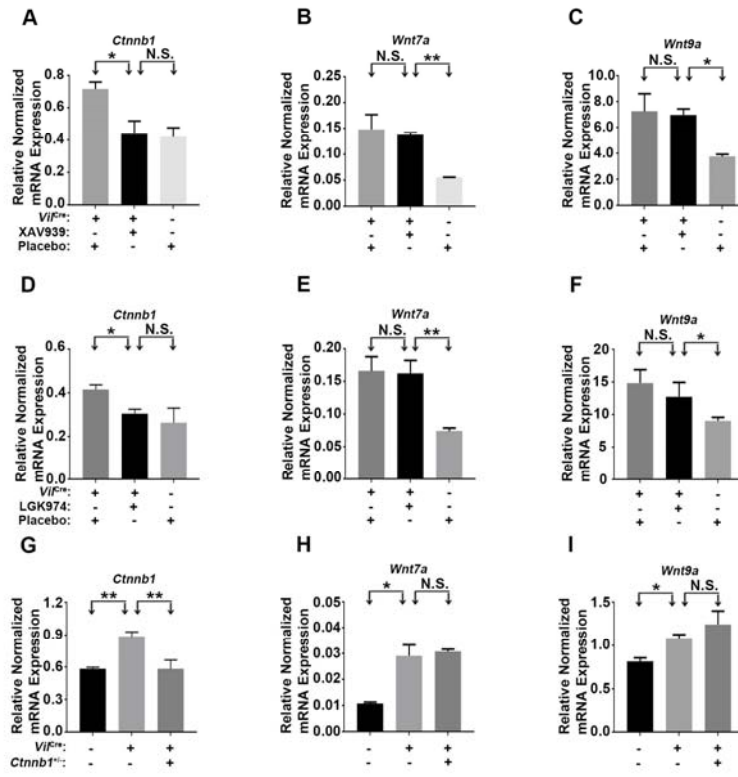

Fig. S8

**Fig. S8. Loss of one *Ctnnb1* allele, or XAV939 or LGK974 treatment, reduces the PC2-loss-associated elevation of renal expression of *Ctnnb1* but not of *Wnt7a* or *Wnt9a*.**

Compound treatments and sample collections were conducted as described in Fig. 1 and Fig. S2-S3. Gene expression was analyzed by quantitative RT-PCR. Data are presented as mean $\pm$ SEM (\*P<0.05, \*\*P<0.01, N.S.= No Significant, n=3, Student's *t* test).



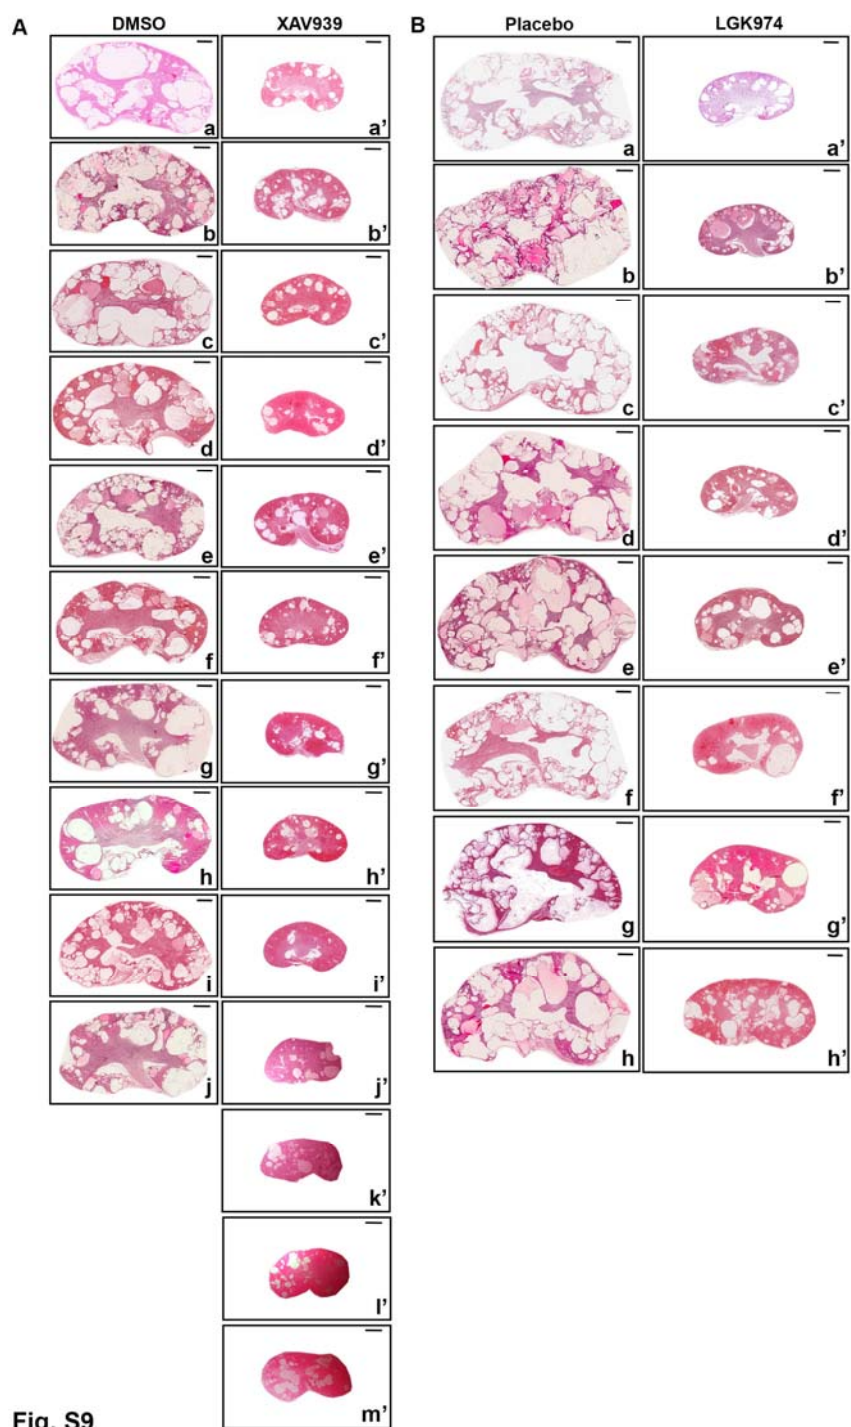

Fig. S9

**Fig. S9. Histology of all the kidneys treated with XAV939 or LGK974 and their placebos.**

(A) Histology of the kidneys from *Vii<sup>Cre</sup>Pkd2<sup>flf</sup>* mice treated with XAV939 (a-j) or placebo (DMSO) (a'-m') was showed. Histology of a and a' have been showed in Fig. 3Bc-d. All samples were collected at 2 months of age.

(B) Histology of the kidneys from *Vii<sup>Cre</sup>Pkd2<sup>flf</sup>* mice treated with LGK974 (a-h) or placebo (a'-h') was showed. Histology of a and a' have been showed in Fig. 4Bc-d. All samples were collected at 3 months of age. Scale bars: 600  $\mu$ m.
